# Supplementary material for: Ratiometric fluorescence imaging for distinguishing chloride concentration between normal and ischemic ventricular myocytes
Source: Royal Society of Chemistry journal article supplement (doi:10.1039/c1cc15258k), 2011-11-07
Supplement: c1cc15258k.pdf [file c1cc15258k.pdf]

1                                    **Electronic Supplementary Information (ESI)**

2

3                    **Ratiometric Fluorescence Imaging for Distinguishing**  
4                    **Chloride Concentration between Normal and Ischemic**  
5                    **Ventricular Myocytes**

6                    **Ping Li,<sup>a</sup> Ting Xie,<sup>a</sup> Nannan Fan,<sup>a</sup> Kexiang Li,<sup>a</sup> Bo Tang<sup>\*a</sup>**

7                    College of Chemistry, Chemical Engineering and Materials Science, Engineering Research Center of Pesticide and  
8                    Medicine Intermediate Clean Production, Ministry of Education, Key Laboratory of Molecular and Nano Probes,  
9                    Ministry of Education, Shandong Normal University, Jinan 250014, P. R. China.

10                  Fax: (+86) 531-8618-0017

11                  E-mail: [tangb@sdu.edu.cn](mailto:tangb@sdu.edu.cn)

12

13

14                  1. Experimental Section

15                  2. Synthesis and characterization of MQAF

16                  3. Supplementary spectral figure

17                  4. MTT Assay

18                  5. Imaging and photobleaching

19                  6. References

20

21

22

23

24

25

26

27

28

29

30

31

32

33

## 1 **1. Experimental Section**

### 2 **Reagents and Apparatus.**

3 Methyl 3-bromopropionate, 6-methoxyquinoline and 5-aminofluorescein were purchased from  
4 Sigma-Aldrich Co. Ltd. All other chemicals were from commercial sources and were of analytical  
5 reagent grade, unless indicated otherwise. Ultra-pure water purified with a Sartorius Arium 611  
6 VF system (Sartorius AG, Germany) to a resistivity of 18.2 MΩ·cm was used throughout the  
7 experiment. Stock solution of MQAF (1.0 mM) was prepared in DMSO and stored at 4 °C in  
8 darkness. HEPES buffer was prepared by dissolving appropriate amount of HEPES in ultrapure  
9 water. The required pH was adjusted by adding appropriate amount of HCl or NaOH. The pH  
10 measurements were performed with a pH-3c digital pH-meter (Shanghai Lei Ci Device Works,  
11 China) with a combined glass-calomel electrode. <sup>1</sup>H NMR, <sup>13</sup>C NMR spectra were taken on a  
12 Bruker 300 MHz spectrometer.

### 13 **Absorption Measurement.**

14 Absorption spectra were recorded at room temperature with a pharماسpect UV-1700 UV-Visible  
15 spectrophotometer (Shimadzu, Japan) equipped with 1.0 cm quartz cells. The probe was diluted to  
16 8.0 μM with 20 mM HEPES buffers at pH 7.4, then the mixture was equilibrated for 1 min before  
17 measurement.

### 18 **Fluorescence Analysis.**

19 All fluorescence measurements were carried out at Cary Eclipse Fluorescence Spectrophotometer  
20 with a xenon lamp and 1.0 cm quartz cells (Varian, Australia). The dual chromophores of the  
21 probe were excited at 318 nm and 494 nm, and the corresponding emission spectra were measured  
22 around 436 nm and 519 nm, respectively. The excitation and emission slits were both set to 5.0  
23 nm.

### 24 **Cell Culture.**

25 Ventricular myocytes (H9c2 (2-1), purchased from the Committee on Type Culture Collection of  
26 the Chinese Academy of Sciences) were maintained following protocols provided by the American  
27 Type Tissue Culture Collection. Cells were grown in cell culture media and incubated at 37 °C in a  
28 5% CO<sub>2</sub>/ 95% air humidified incubator (MCO-15AC, SANYO). The cell culture medium was  
29 high glucose Dulbecco's Modified Eagle Medium (DMEM, 4.5 g of glucose/L) supplemented with  
30 10% fetal bovine serum (Gibco, Invitrogen), NaHCO<sub>3</sub> (2.0 g/L) and 1% antibiotics (penicillin  
31 /streptomycin, 100 U/ml).

### 32 **Confocal Imaging.**

33 Fluorescent images were acquired on a Leica TCS SPE confocal laser-scanning microscope with  
34 an objective lens (×40). The emission was collected by the blue channel at 420-450 nm and the  
35 green channel at 510-540 nm respectively. Prior to imaging, cells were incubated with 20 μM  
36 probe for 10 min at 37 °C in a 5% CO<sub>2</sub>/ 95% air humidified incubator, and then the medium was  
37 removed and washed with HEPES (pH 7.4, 20 mM) for three times.

### 38 **Treatment of Normal and Ischemic Ventricular Myocytes.**

39 Before treatment, the concentration of counted cells was adjusted to 10<sup>5</sup> cells mL<sup>-1</sup>. Subsequently,  
40 cells were added to the sterilized glass coverslips in culture plates and cultured. After cell adherent,  
41 for the blank group: cells were incubated with chloride-free Tyrode solution for 3 hours at 37 °C  
42 under a humidified atmosphere containing 5% CO<sub>2</sub>; for the control group: conditions were same  
43 as the blank group except for the normal Tyrode solution<sup>1</sup> was used instead; for the simulated

1 ischemia group: cells were incubated with simulated ischemia solution<sup>2</sup> in an airtight equipment  
2 for 3 hours at 37 °C under a humidified atmosphere filled with 5% CO<sub>2</sub> and 95% N<sub>2</sub>.

### 3 **Treatment of Different Extent of Myocardial Ischemia.**

4 Cell adherent procedure was the same as that mentioned above. Then, for the SITS group: cells  
5 were dealt with the same method used in the simulated ischemia group, except that an additional  
6 chloride channel blocker SITS (0.1 mmol.L<sup>-1</sup>) were added into the simulated ischemia solution; for  
7 the 50% Cl<sup>-</sup> group, 25% Cl<sup>-</sup> group and the Cl<sup>-</sup> free group: cells were incubated with simulated  
8 ischemic solution containing 50% Cl<sup>-</sup>, 25% Cl<sup>-</sup>, no Cl<sup>-</sup> contrast to the simulated ischemia group,  
9 respectively, the other conditions were the same.

### 10 **MTT assay**

11 Ventricular myocytes (1.0 × 10<sup>6</sup> cells mL<sup>-1</sup>) were dispersed within replicate 96-well microtiter  
12 plates to a total volume of 200 μL/well respectively. Plates were maintained at 37 °C in a 5%  
13 CO<sub>2</sub>/95% air incubator for 5 h. Ventricular myocytes were then incubated for 24 h upon different  
14 probe concentrations of 4.0×10<sup>-4</sup>, 8.0×10<sup>-5</sup>, 4.0×10<sup>-5</sup>, 8.0×10<sup>-6</sup> and 8.0×10<sup>-7</sup> M, respectively. MTT  
15 solution (5.0 mg/mL, PBS, 150 μL) was then added to each well. After 4h, the remaining MTT  
16 solution was removed and 150 μL of DMSO was added to each well to dissolve the formazan  
17 crystals. Absorbance was measured at 490 nm in a TRITURUS microplate reader. Calculation of  
18 IC50 values were done according to Huber, W. et al.<sup>3</sup>

### 19 **Imaging and photobleaching**

20 The treatment of cells was same as the blank group.

21

## 22 **2. Synthesis and characterization of MQAF**

### 23 **Synthesis and characterization of 6-methoxyquinoline-N-methyl-3 bromopropionate**

#### 24 **(MQMBP)**

25 The starting step was preparation of the protonated form of 6-methoxyquinoline ramification.  
26 Using the methods described previously by Verkman,<sup>4</sup> we synthesized MQMBP.

27 Scheme 2.

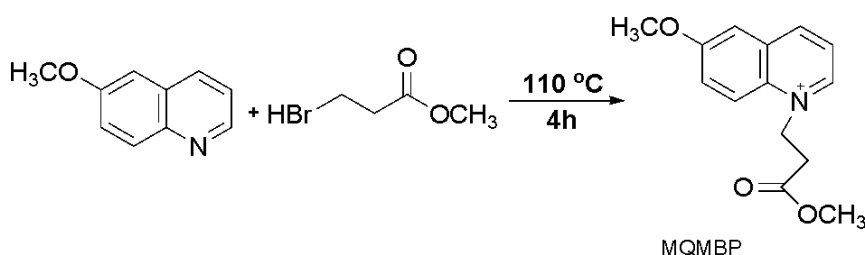

29 Briefly, methyl 3-bromopropionate (2.505 g, 15 mmol) was dissolved in 6-methoxyquinoline  
30 (1.592 g, 10 mmol). Keep the reaction temperature at 110 °C for 4 h to gain an orange viscous  
31 mass, then the mixture was cooled to room temperature and washed with large volumes of acetone  
32 overnight with stirring. The insoluble product was collected by centrifugation and an ivory-white  
33 product was collected. (2.03 g, 77.5%) <sup>1</sup>H NMR (300 MHz, DMSO): δ 3.13-3.18(t, 2H),  
34 5.25-5.29(t,2H), 3.73(s, 3H), 3.99(s, 3H), 8.54-8.58(d,1H), 9.40-9.42(d,1H), 8.13-8.21(t,1H),  
35 8.07(s,1H), 8.03-8.05(d,1H), 9.04-9.07(d,1H). <sup>13</sup>C NMR (75 MHz, DMSO): 171.8, 159.5, 146.3,  
36 146.2, 142.6, 128.0, 127.6, 122.7, 121.0, 108.9, 56.7, 53.4, 52.3, 33.7.

### 37 **Synthesis and characterization of MQAF**

1 MQMBP (0.1311 g, 0.5 mmol) was dissolved in 10 mL methanol and stirred, then  
2 5-amino-fluorescein (0.1736 g, 0.5 mmol) in 10 mL methanol was added to the above solution,  
3 subsequently, Na<sub>2</sub>CO<sub>3</sub> (0.01251 g, 0.125 mmol) was added and the mixture was brought to a  
4 reflux with stirring at 67 °C. After 6 h, the solvent was evaporated and a red brown solid (0.2237 g,  
5 79.8%) was obtained. <sup>1</sup>H NMR (300 MHz, DMSO): δ 1.03-1.08(t, 2H), 2.51(s,2H), 3.90(s, 3H),  
6 4.00(d, 1H), 5.75(s,1H), 6.56-6.58(m,1H), 6.61-6.65(d,1H),6.84(m,1H), 6.87(s,1H), 6.94(s,1H),  
7 6.97-6.99(d,1H), 7.37(s,1H). 7.41(s,1H), 7.45-7.47(d,1H), 7.90(d,1H), 7.93(t,1H),  
8 8.24-8.27(m,1H), 8.72-8.74(d,1H), 9.37(d,1H), 10.02(s,1H). <sup>13</sup>C NMR (75 MHz, DMSO): 170.8,  
9 169.9, 159.7, 157.6, 152.4, 151.0, 148.3, 144.2,140.1, 135.2, 130.8, 129.5, 128.2, 127.9, 124.6,  
10 122.7, 122.1, 121.0, 112.9, 111.2, 108.8, 106.2, 102.6, 83.2, 56.8, 56.0, 53.5, 52.3, 40, 8, 39.3,  
11 33.6.  
12 Scheme 3.

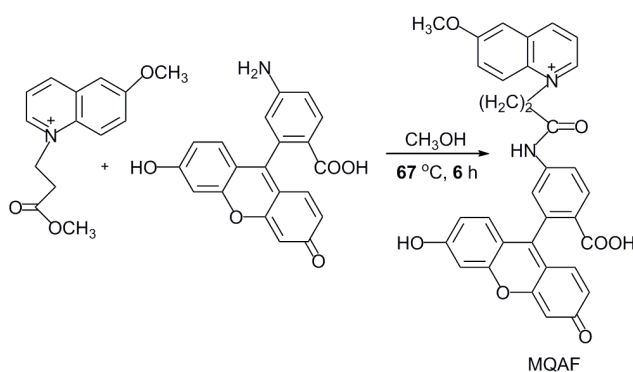

13  
14 **3. Supplementary spectral figure**  
15 **Absorption spectrum of MQAF.**

16 Absorption and fluorescence spectral properties of MQAF were examined. As can be seen in  
17 Figure S1, the dual chromophores probe exhibits the characteristic absorption of MQMBP  
18 fragment at 308 nm, while exhibit intense absorption peaks of AF fragment at 450 nm and 478  
19 nm.

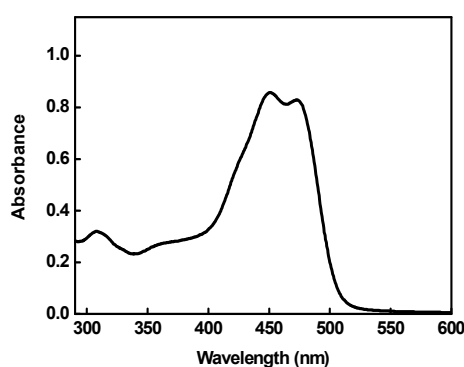

20  
21 **Figure S1.** Absorption spectrum of MQAF (8.0 μM) in 20 mM HEPES (pH 7.4) at room temperature.

22 **Full emission spectra of MQAF with excitation at 318 nm.**

23 The dual-chromophore probe MQAF contains two fragments: the MQMBP fragment ( $\lambda_{\text{ex}}/\lambda_{\text{em}} =$   
24 318/436 nm) and AF fragment ( $\lambda_{\text{ex}}/\lambda_{\text{em}} = 494/519$  nm). When the probe was excited by 318 nm, the  
25 AF wouldn't be excited well, since it was not the maximum excitation wavelength of AF. The  
26 corresponding full emission spectrum was showed in Figure S2. For this reason, MQAF was  
27 excited separately by 318 nm and 494 nm during the experiments.

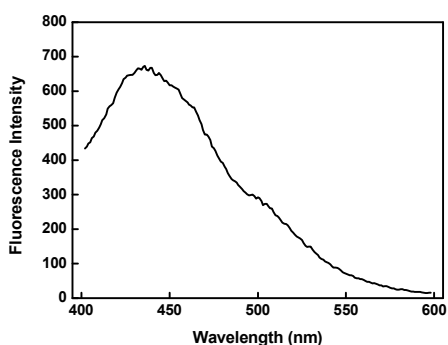

1

2 **Figure S2.** The full emission fluorescence spectra of 8.0  $\mu\text{M}$  MQAF in HEPES buffer (20 mM, pH 7.4) under the  
3 excitation at 318 nm.

#### 4 **Fluorescence spectra of MQAF.**

5 As is shown in Figure S3a and S3b, the maximum wavelengths of excitation and emission of  
6 the two chromophores of the MQAF lie at 318 nm/436 nm and 494 nm/519 nm, respectively.  
7 When chloride was added, an obvious fluorescence decrease of the MQMBP fragment was  
8 observed, while the fluorescence of the AF fragment keeps nearly unchanged.

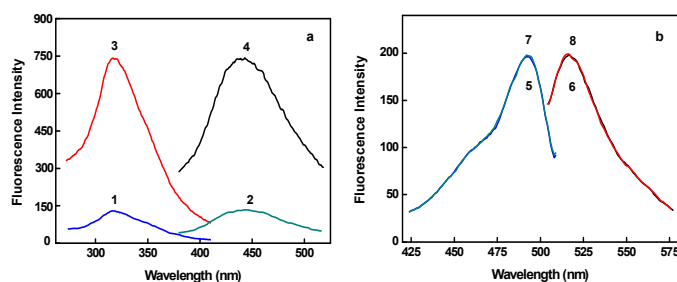

9

10 **Figure S3.** Fluorescence spectra of MQAF (8.0  $\mu\text{M}$ ). (a) Excitation spectra (lines 1 and 3) and the emission spectra  
11 (lines 2 and 4; excitation at 318 nm) either with (lower lines) or without (upper lines)  $\text{Cl}^-$ ; (b) Excitation spectra  
12 (lines 5 and 7) and the emission spectra (lines 6 and 8; excitation at 494 nm) either with (line 7 and 8) or without  
13 (line 5 and 6)  $\text{Cl}^-$ ; The spectra were acquired in 20 mM HEPES buffer (pH 7.4).

#### 14 **Influence of pH on fluorescence ratio.**

15 The effect of pH on the reaction was studied (Figure S4). , The probe shows a slight  
16 pH-dependence before and after  $\text{Cl}^-$  addition within the physiological conditions (pH 6.8-8.2). We  
17 choose pH 7.4 throughout experiments.

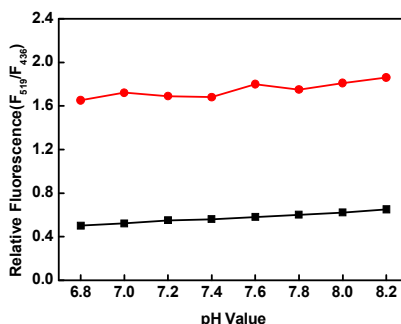

18

19 **Figure S4.** Effect of pH on fluorescence ratio before (square solid) and after (circle solid) addition of NaCl (75  
20 mM) in 20 mM HEPES with a probe concentration of 8.0  $\mu\text{M}$ .

#### 21 **Optimization of probe concentration.**

1 We monitored the effect of probe concentration. The ratio of the fluorescent intensities at two  
2 wavelengths is less dependent on the probe concentration showed in Figure S5. A concentration of  
3 MQAF at 8.0  $\mu\text{M}$  was employed in experiments.

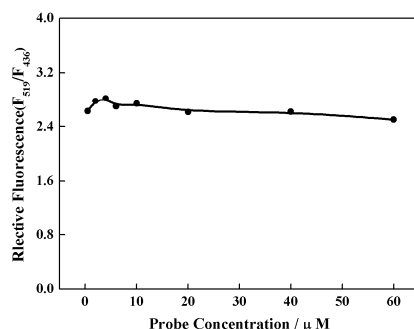

4

5 **Figure S5.** Effect of probe concentrations on the ratio of fluorescence intensity in 20 mM HEPES (pH 7.4) after  
6 the addition of 75 mM  $\text{Cl}^-$  at room temperature.

### 7 **Kinetic assays**

8 To test the photostability of the probe, the kinetic behavior of the reaction was investigated. The  
9 fluorescence signal was recorded as a function of reaction time for 60 min. Figure S6a and S6d  
10 were the fluorescence intensity of MQMBP fragment with time before and after  $\text{Cl}^-$  addition, the  
11 fluorescence intensity of AF fragment in the absence and presence of  $\text{Cl}^-$  can be seen from Figure  
12 S6b and S6c. The two fluorescence intensities of the probe remain almost constant with passage of  
13 time without and with  $\text{Cl}^-$ , which indicated that MQAF could instantly respond to the chloride, and  
14 the probe solution is stable to the medium such as light and air.

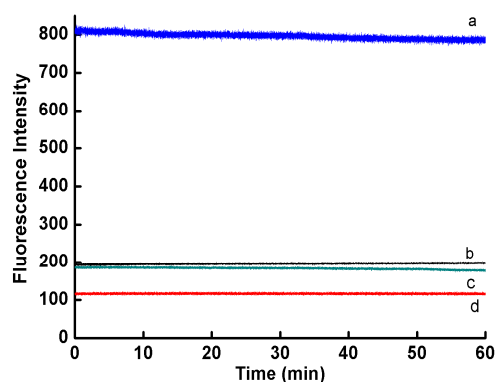

15

16 **Figure S6.** Time course of fluorescence intensity of 8.0  $\mu\text{M}$  MQAF. The fluorescence intensity of MQMBP (line a  
17 and d) before and after  $\text{Cl}^-$  (100 mM) addition with the time change, the fluorescence intensity of AF (line b and c)  
18 without and with  $\text{Cl}^-$  (100 mM). The experiment was carried out in HEPES buffer (20 mM, pH 7.4).

19

### 20 **4. MTT assay**

21 MTT assays were performed in ventricular myocytes with five probe concentrations of  $4.0 \times 10^{-4}$ ,  
22  $8.0 \times 10^{-5}$ ,  $4.0 \times 10^{-5}$ ,  $8.0 \times 10^{-6}$  and  $8.0 \times 10^{-7}$  M. According to the experimental data, we calculated  
23  $\text{IC}_{50} = 9.0 \times 10^{-4}$  M. The result showed that our probe has low toxicity to ventricular myocytes  
24 under the experimental conditions at the concentration of  $2.0 \times 10^{-5}$  M.

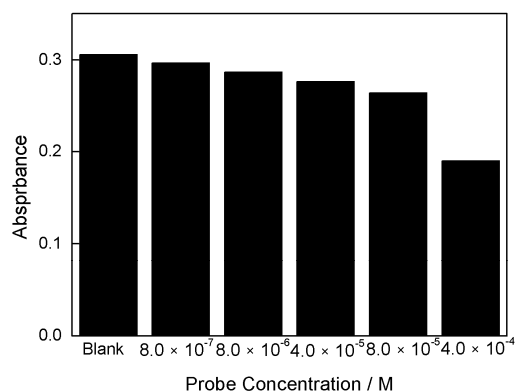

1

2

**Figure S7.** MTT assay of ventricular myocytes in the presence of the probe.

3

4

### **5. Imaging and photobleaching**

5

To further confirm photostability of the probe, the photobleaching of the probe in cultured cells were investigated (Figure S8). Under different power sources, we observed the fluorescent brightness of the probe. The fluorescent intensity of 6-methoxyquinoline and 5-amino-fluorescein are both changeless, even if laser source power is increased, and these results show that the probe is photostable under experimental conditions.

9

10

11

12

13

14

15

16

17

18

19

20

21

22

23

24

25

26

27

28

29

30

31

32

33

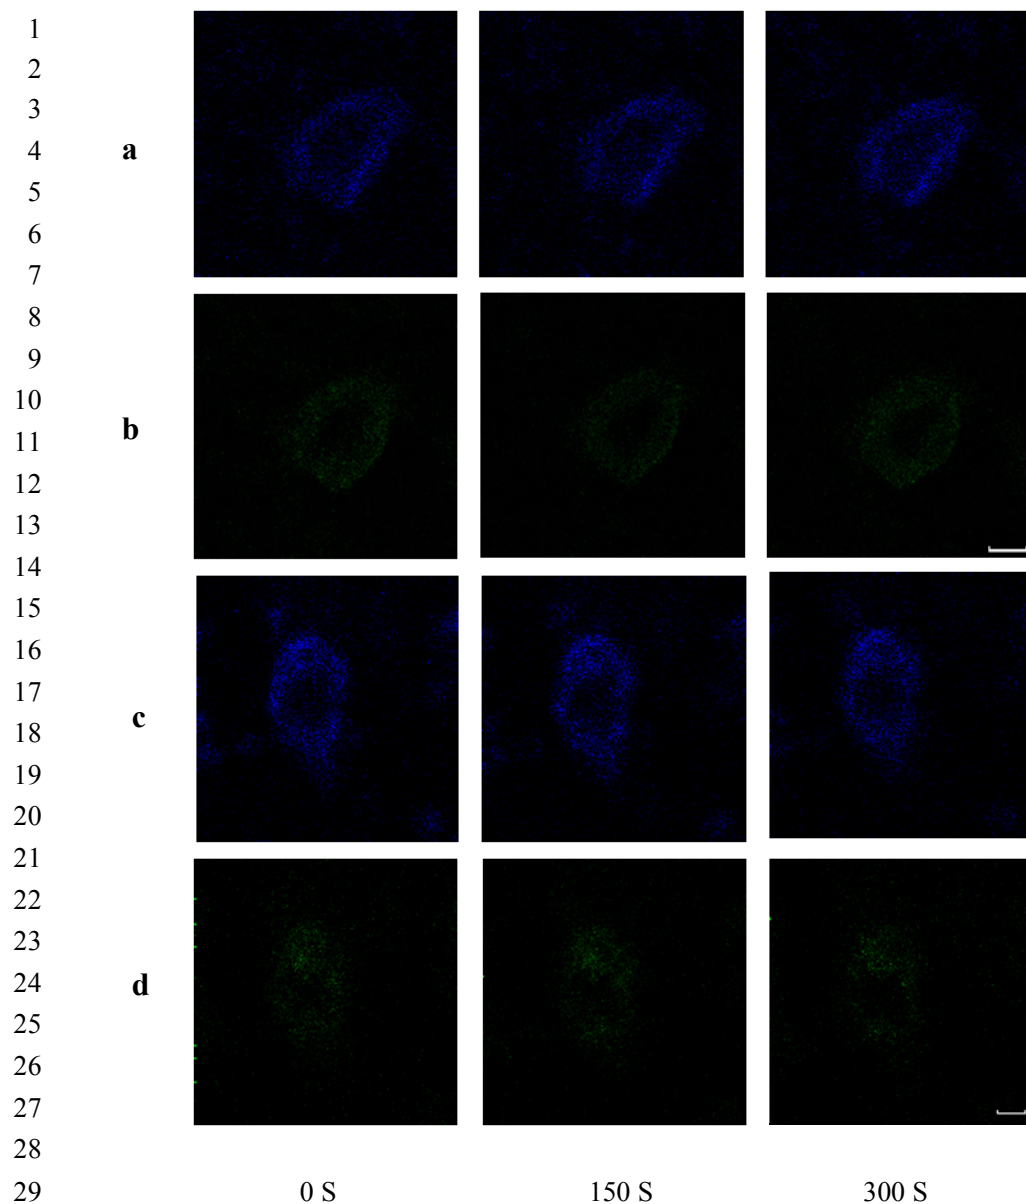

31 **Figure S8.** Confocal fluorescence imaging of ventricular myocytes with different time. Cells incubated with 20  
32  $\mu\text{M}$  probe for 10 min at 37 °C were washed with HEPES buffer (20 mM, pH 7.4) for three times before  
33 experiments. a and c were images of quinoline fragment under the power sources 40 mW and 50 mW, respectively;  
34 b and d were images of fluorescein fragment under the power sources 4.5 mW and 8.1 mW, respectively. The bar  
35 of a and b is 10  $\mu\text{M}$ , c and d is 5  $\mu\text{M}$ .

## 36 37 38 **6. References**

- 39 1 G. R. Ferrier, M. P. Moffat, A. Lukas, *Circ. Res.* 1985, **56**, 184-194.  
40 2 B. Michalke, P. Schramel, S. Hasse, *Mikrochim. Acta.* 1996, **122**, 67-76.  
41 3 Huber, W.; Koella, *J. C. Acta. Trop.* 1993, **55**, 257-261.  
42 4 S. Jayaraman, Y. L. Song, L. Vetrivel, L. Shankar, A. S. Verkman, *J. Clin. Invest.*, 2001, **107**, 317-324.



# 1 <sup>1</sup>H NMR of MQMBP

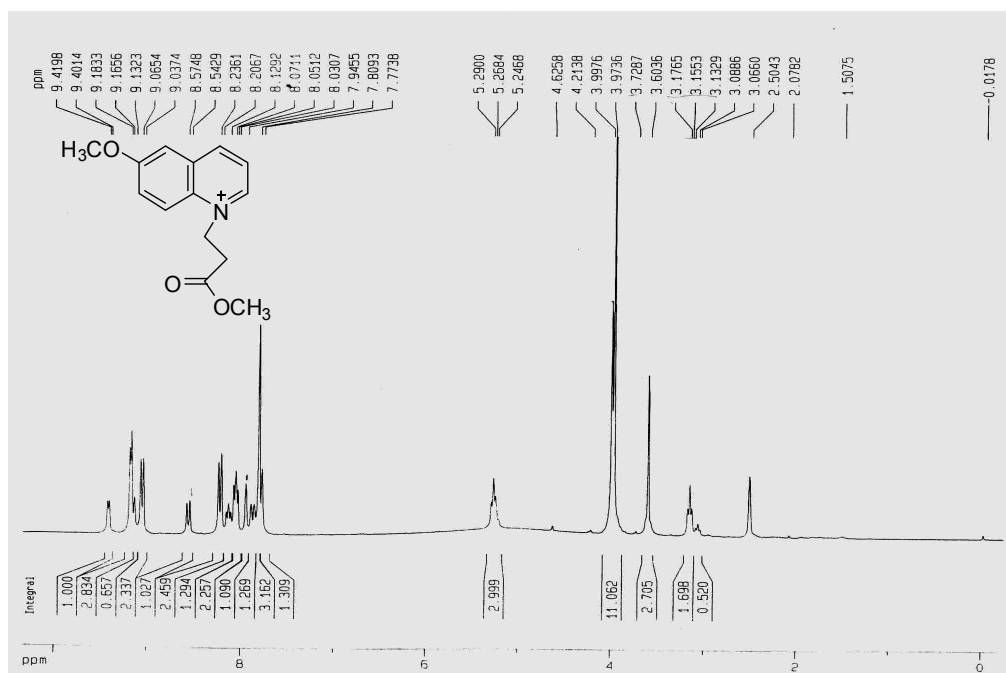

2

3

# 4 <sup>13</sup>C NMR of MQMBP

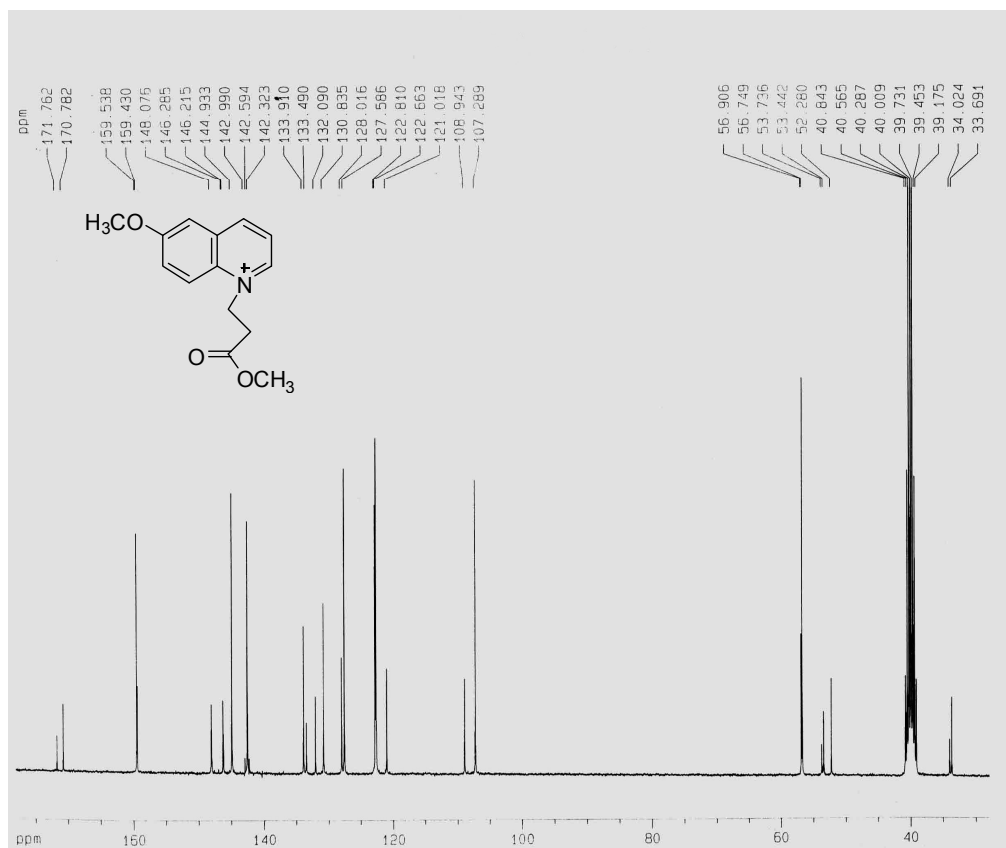

5

6

7

1

2 **<sup>1</sup>H NMR of MQAF**

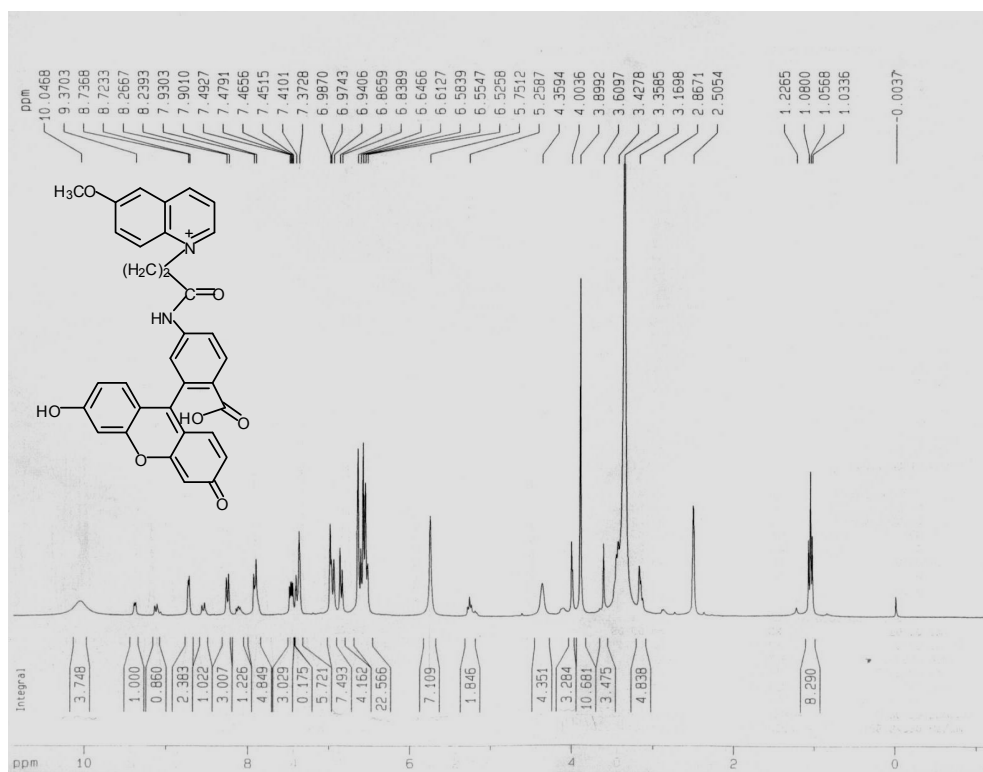

3

4

5 **<sup>13</sup>C NMR of MQAF**

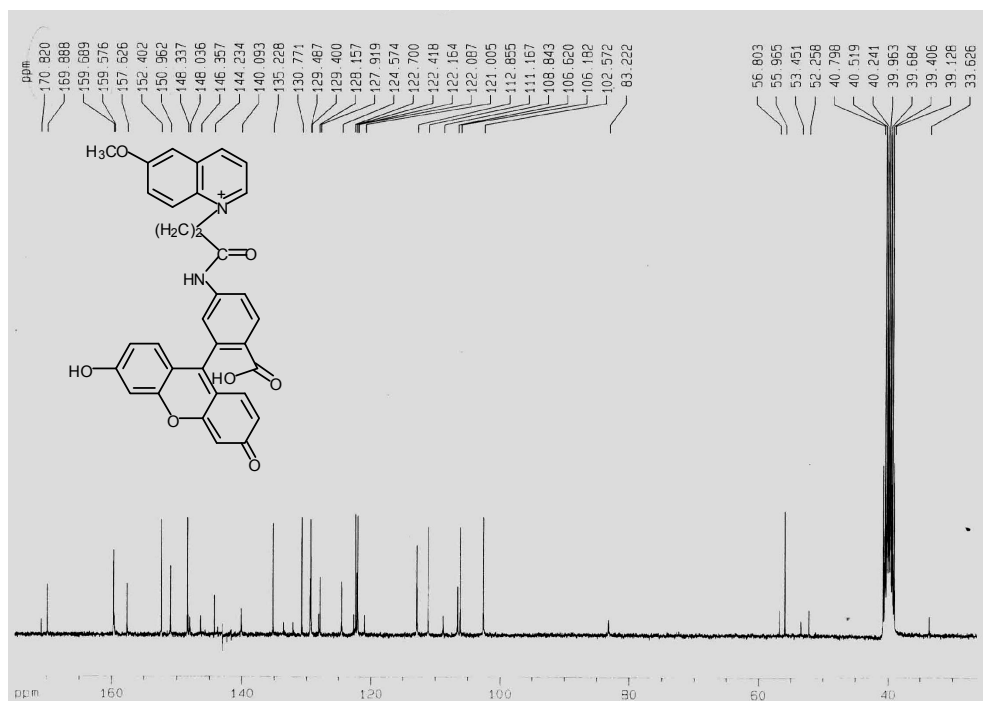

6

7

8

9

10
